# Supplementary material for: Aurora kinase A (AURKA) interaction with Wnt and Ras-MAPK signalling pathways in colorectal cancer
Source: PubMed Central journal article supplement (PMC5951826; doi:10.1038/s41598-018-24982-z), 2018-05-14
Supplement: 41598_2018_24982_MOESM1_ESM.pdf [file 41598_2018_24982_MOESM1_ESM.pdf]

## Supplementary information for

### **Aurora kinase A (AURKA) interaction with Wnt and Ras-MAPK signalling pathways in colorectal cancer**

Annika Jacobsen<sup>1</sup>, Linda J.W. Bosch<sup>2</sup>, Sanne R. Martens-de Kemp<sup>2</sup>, Beatriz Carvalho<sup>2</sup>, Anke H. Sillars-Hardebol<sup>3</sup>, Richard J. Dobson<sup>4</sup>, Emanuele de Rinaldis<sup>5</sup>, Gerrit A. Meijer<sup>2</sup>, Sanne Abeln<sup>1</sup>, Jaap Heringa<sup>1</sup>, Remond J.A. Fijneman<sup>2</sup>, K. Anton Feenstra<sup>1</sup>

#### Affiliations:

<sup>1</sup>Centre for Integrative Bioinformatics (IBIVU), Vrije Universiteit Amsterdam, Amsterdam, The Netherlands. <sup>2</sup>Department of Pathology, The Netherlands Cancer Institute, Amsterdam, The Netherlands. <sup>3</sup>Department of Pathology, VU University Medical Center, Amsterdam, The Netherlands. <sup>4</sup>Bioinformatics group at the NIHR Biomedical Research Centre for Mental Health (IOP) and the South London and Maudsley NHS Trust, London, UK. <sup>5</sup>The BRC Translational Bioinformatics Unit at the NIHR Biomedical Research Centre at Guy's and St Thomas' NHS Foundation Trust and King's College London, London, UK.

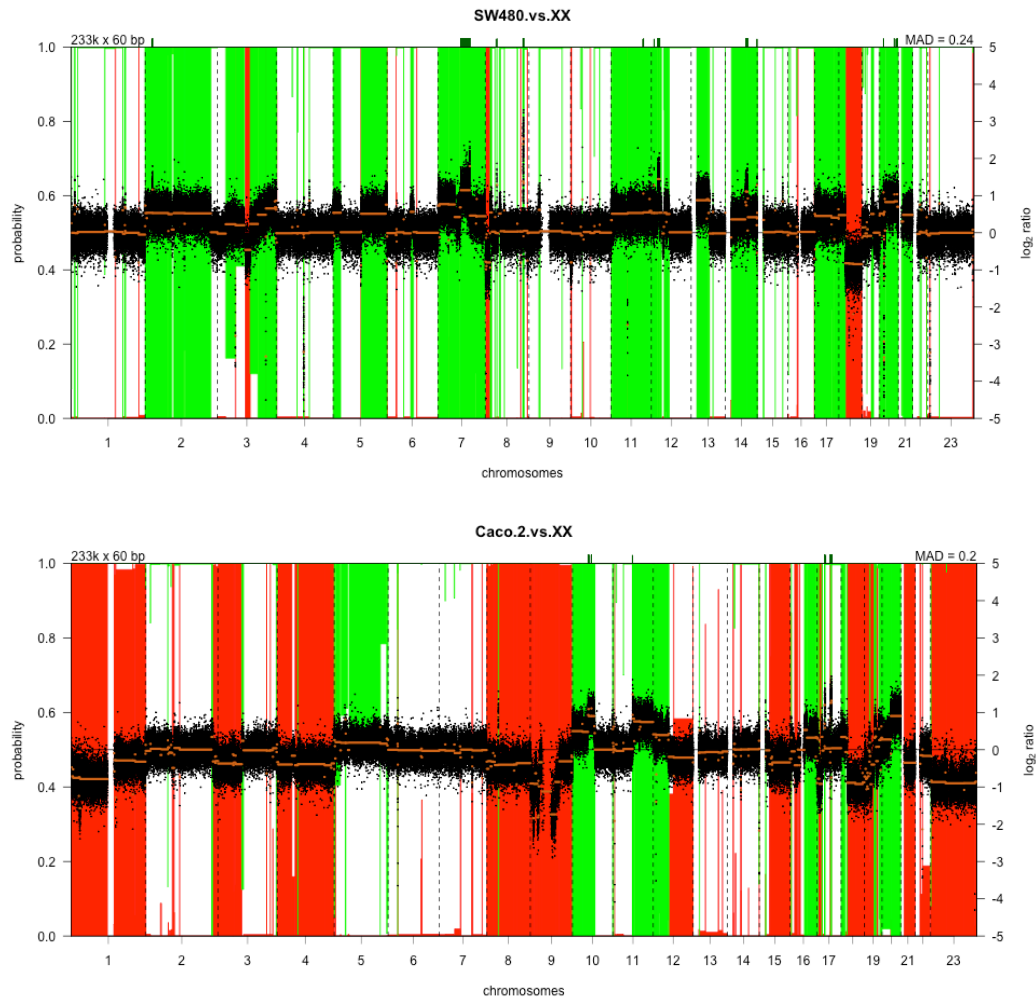

**Supplementary Fig. S1. DNA copy number profile (aCGH) for SW480 (upper panel) and Caco2 (lower panel), respectively.** Green represents regions with gain and red represents regions with loss (also represented by the positive/negative  $\log_2$  ratio). The figures show that 20q is gained in both cells lines, SW480 otherwise has many gained regions, whereas Caco2 has many lost regions.

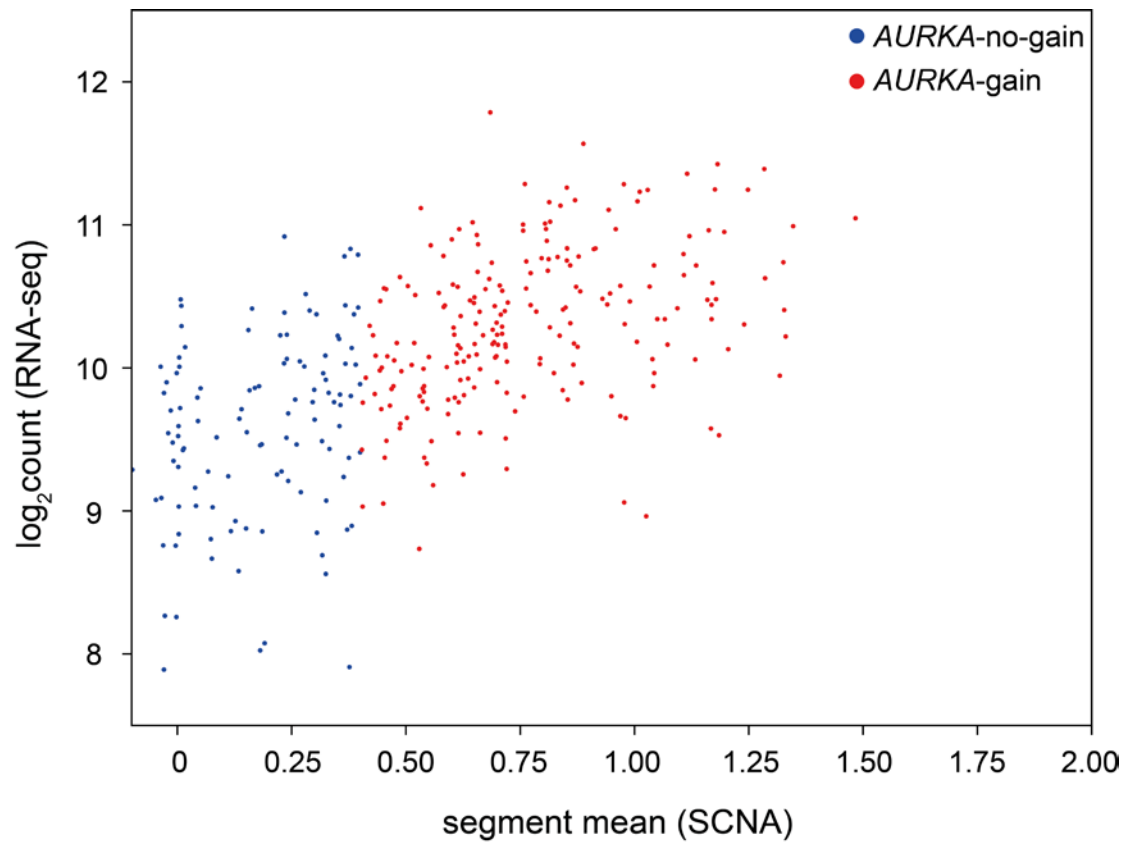

**Supplementary Fig. S2.** Segment mean (SCNA; DNA copy number) plotted against log<sub>2</sub>count (RNA-seq, mRNA expression) for 330 *AURKA*-no-gain and *AURKA*-gain TCGA COADREAD samples. *AURKA*-gain samples were determined at a segment mean  $\geq 0.4$ .

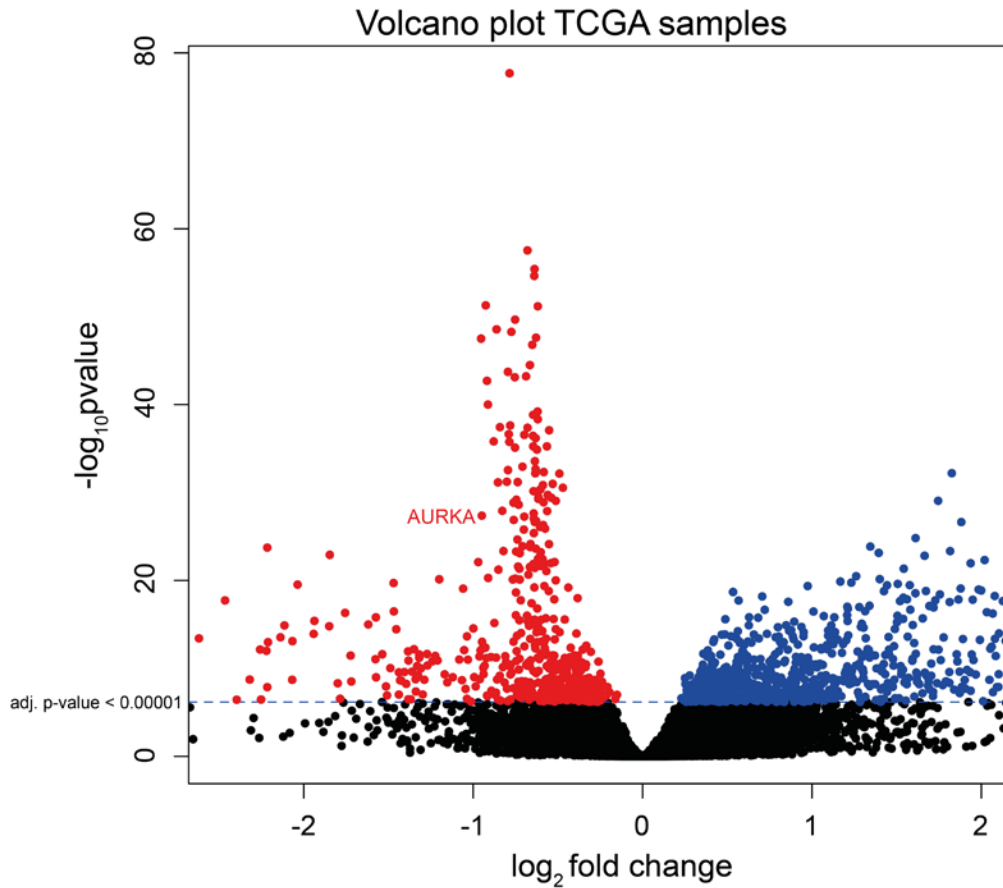

**Supplementary Fig. S3.** Volcano plot of the genes differentially expressed between 330 *AURKA*-no-gain and *AURKA*-gain TCGA COADREAD samples. The threshold for significantly deregulated genes was set at an adjusted p-value less than  $10^{-5}$ .

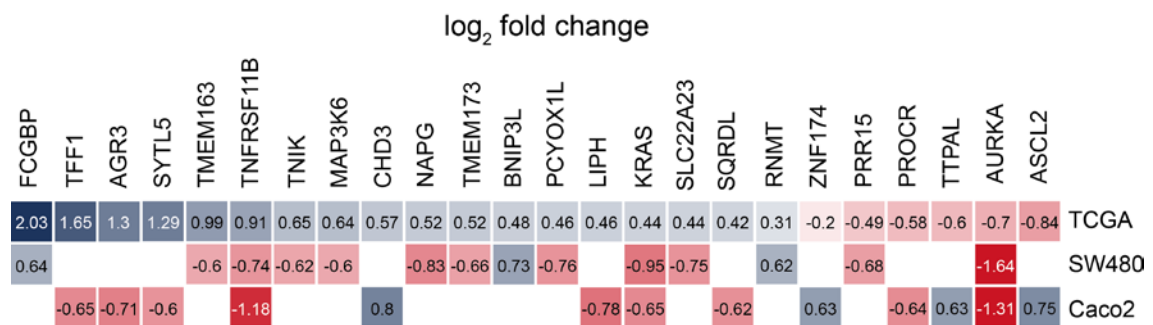

**Supplementary Fig. S4.** The significantly deregulated genes from the TCGA COADREAD DEA (*AURKA*-no-gain vs. *AURKA*-gain) compared to the sets of genes significantly deregulated in the DEA of the two cell lines, SW480 and Caco2, upon *AURKA* downmodulation. log<sub>2</sub> fold change is shown for each gene in the intersection, further illustrated by blue for upregulation and red for downregulation.
